# Supplementary material
Source: PubMed Central journal article supplement (PMC5777252)
Supplement: 10.1074_M117.812388_jbc.M117.812388-1.pdf [file 10.1074_M117.812388_jbc.M117.812388-1.pdf]

*Supporting Information for:*

# Structural Features of $\alpha$ -Synuclein Amyloid Fibrils Revealed by Raman Spectroscopy

*Jessica D. Flynn, Ryan P. McGlinchey, Robert L. Walker III, and Jennifer C. Lee\**

Laboratory of Protein Conformation and Dynamics, Biochemistry and Biophysics Center,  
National Heart, Lung, and Blood Institute, National Institutes of Health  
Bethesda, MD 20892 United States

\*Email: [leej4@mail.nih.gov](mailto:leej4@mail.nih.gov), Phone: (301) 496-3741

## Contents:

- Table S1: Mass spectrometry data for Cathepsin L (CtsL) limited proteolysis
- Table S2: Raman peak ratio comparison for WT and mutant  $\alpha$ -syn fibrils
- Figure S1: Expanded view of amide-II region for soluble and aggregated WT- $\alpha$ -syn fibrils
- Figure S2: Transmission electron micrographs of WT and disease-related mutant  $\alpha$ -syn fibrils
- Figure S3: Expanded view and second derivative analysis of WT and mutant  $\alpha$ -syn fibrils

**Table S1.** MS analysis taken after incubating recombinant WT (**A**), A30P (**B**), E46K (**C**), G51D (**D**), or A53T (**E**)  $\alpha$ -syn fibrils (30  $\mu$ M) with either 150, 300, 450 or 600 nM CtsL for 24 h at pH 5 and 37 °C.

| A CtsL (150–600 nM) + WT $\alpha$ -syn <sub>f</sub> (30 $\mu$ M) |                       |                                    | B CtsL (150–600 nM) + A30P $\alpha$ -syn <sub>f</sub> (30 $\mu$ M) |                       |                                    |
|------------------------------------------------------------------|-----------------------|------------------------------------|--------------------------------------------------------------------|-----------------------|------------------------------------|
| Observed Mass (Da)                                               | Theoretical Mass (Da) | Position of $\alpha$ -syn sequence | Observed Mass (Da)                                                 | Theoretical Mass (Da) | Position of $\alpha$ -syn sequence |
| 14459.22                                                         | 14460.10              | 1–140                              | 14485.21                                                           | 14486.19              | 1–140                              |
| 13836.00                                                         | 13836.37              | 6–140                              | 13861.37                                                           | 13862.41              | 6–140                              |
| 13450.40                                                         | 13450.91              | 10–140                             | 13476.13                                                           | 13476.95              | 10–140                             |
| 12832.55                                                         | 12833.49              | 1–126                              | 12692.04                                                           | 12694.01              | 18–140                             |
| 12667.13                                                         | 12667.97              | 18–140                             | 12366.44                                                           | 12367.04              | 1–122                              |
| 12340.35                                                         | 12341.00              | 1–122                              | 11742.44                                                           | 11743.26              | 6–122                              |
| 11717.43                                                         | 11717.22              | 6–122                              | 10574.10                                                           | 10574.86              | 18–122                             |
| 11456.61                                                         | 11457.07              | 1–114                              | 9690.55                                                            | 9690.93               | 18–114                             |
| 10547.98                                                         | 10548.82              | 18–122                             |                                                                    |                       |                                    |
| 10447.18                                                         | 10447.83              | 10–114                             |                                                                    |                       |                                    |
| 9664.44                                                          | 9664.89               | 18–114                             |                                                                    |                       |                                    |
| 8679.97                                                          | 8680.77               | 28–114                             |                                                                    |                       |                                    |

  

| C CtsL (150–600 nM) + E46K $\alpha$ -syn <sub>f</sub> (30 $\mu$ M) |                       |                                    | D CtsL (150–600 nM) + G51D $\alpha$ -syn <sub>f</sub> (30 $\mu$ M) |                       |                                    |
|--------------------------------------------------------------------|-----------------------|------------------------------------|--------------------------------------------------------------------|-----------------------|------------------------------------|
| Observed Mass (Da)                                                 | Theoretical Mass (Da) | Position of $\alpha$ -syn sequence | Observed Mass (Da)                                                 | Theoretical Mass (Da) | Position of $\alpha$ -syn sequence |
| 14458.34                                                           | 14459.21              | 1–140                              | 14517.28                                                           | 14518.19              | 1–140                              |
| 13834.72                                                           | 13835.43              | 6–140                              | 13893.28                                                           | 13894.41              | 6–140                              |
| 12339.30                                                           | 12340.06              | 1–122                              | 13508.08                                                           | 13508.95              | 10–140                             |
| 13449.16                                                           | 13449.97              | 10–140                             | 12725.48                                                           | 12726.01              | 18–140                             |
| 12666.34                                                           | 12667.03              | 18–140                             | 12398.06                                                           | 12399.04              | 1–122                              |
| 11716.04                                                           | 11716.28              | 6–122                              | 11514.06                                                           | 11515.11              | 1–114                              |
| 11455.67                                                           | 11456.13              | 1–114                              | 10605.84                                                           | 10606.85              | 18–122                             |
| 10574.10                                                           | 10574.88              | 18–122                             | 9722.55                                                            | 9722.93               | 18–114                             |
| 9663.29                                                            | 9663.95               | 18–114                             | 8738.14                                                            | 8738.81               | 28–114                             |
| 8678.99                                                            | 8679.83               | 28–114                             |                                                                    |                       |                                    |

  

| E CtsL (150–600 nM) + A53T $\alpha$ -syn <sub>f</sub> (30 $\mu$ M) |                       |                                    |
|--------------------------------------------------------------------|-----------------------|------------------------------------|
| Observed Mass (Da)                                                 | Theoretical Mass (Da) | Position of $\alpha$ -syn sequence |
| 14489.26                                                           | 14490.18              | 1–140                              |
| 11485.84                                                           | 11487.10              | 1–114                              |
| 12369.34                                                           | 12371.03              | 1–122                              |
| 10578.06                                                           | 10578.84              | 18–122                             |
| 9694.32                                                            | 9694.92               | 18–114                             |
| 8709.92                                                            | 8710.79               | 28–114                             |

**Table S2.** Raman peak ratio comparison for (A) amide-III and (B) C-H deformation stretches for WT and mutant  $\alpha$ -syn.

**A**

| Amide-III Band: 1275 cm <sup>-1</sup> /1284 cm <sup>-1</sup> |                       |                       |       |
|--------------------------------------------------------------|-----------------------|-----------------------|-------|
| <i>Mutant</i>                                                | 1275 cm <sup>-1</sup> | 1284 cm <sup>-1</sup> | Ratio |
| WT                                                           | 0.684                 | 0.619                 | 1.11  |
| A30P                                                         | 0.607                 | 0.530                 | 1.15  |
| E46K                                                         | 0.723                 | 0.689                 | 1.05  |
| G51D                                                         | 0.686                 | 0.583                 | 1.18  |
| A53T                                                         | 0.734                 | 0.655                 | 1.12  |

**B**

| C-H Def. Band: 1316 cm <sup>-1</sup> /1340 cm <sup>-1</sup> |                       |                       |       |
|-------------------------------------------------------------|-----------------------|-----------------------|-------|
| <i>Mutant</i>                                               | 1316 cm <sup>-1</sup> | 1340 cm <sup>-1</sup> | Ratio |
| WT                                                          | 0.643                 | 0.607                 | 1.06  |
| A30P                                                        | 0.581                 | 0.526                 | 1.10  |
| E46K                                                        | 0.668                 | 0.624                 | 1.07  |
| G51D                                                        | 0.588                 | 0.614                 | 0.96  |
| A53T                                                        | 0.721                 | 0.680                 | 1.06  |

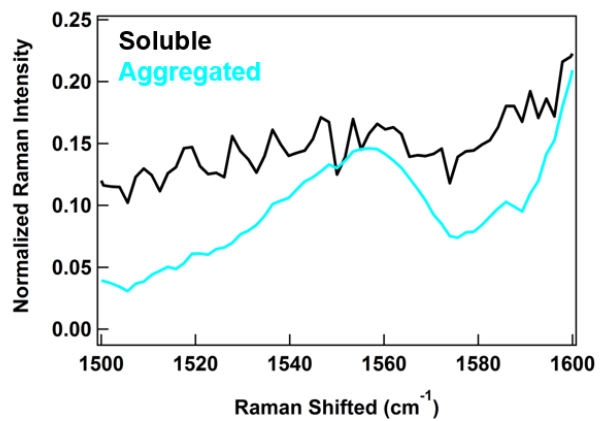

**Figure S1.** Expanded view of amide-II band for soluble (black trace) and aggregated (cyan trace) WT- $\alpha$ -syn.

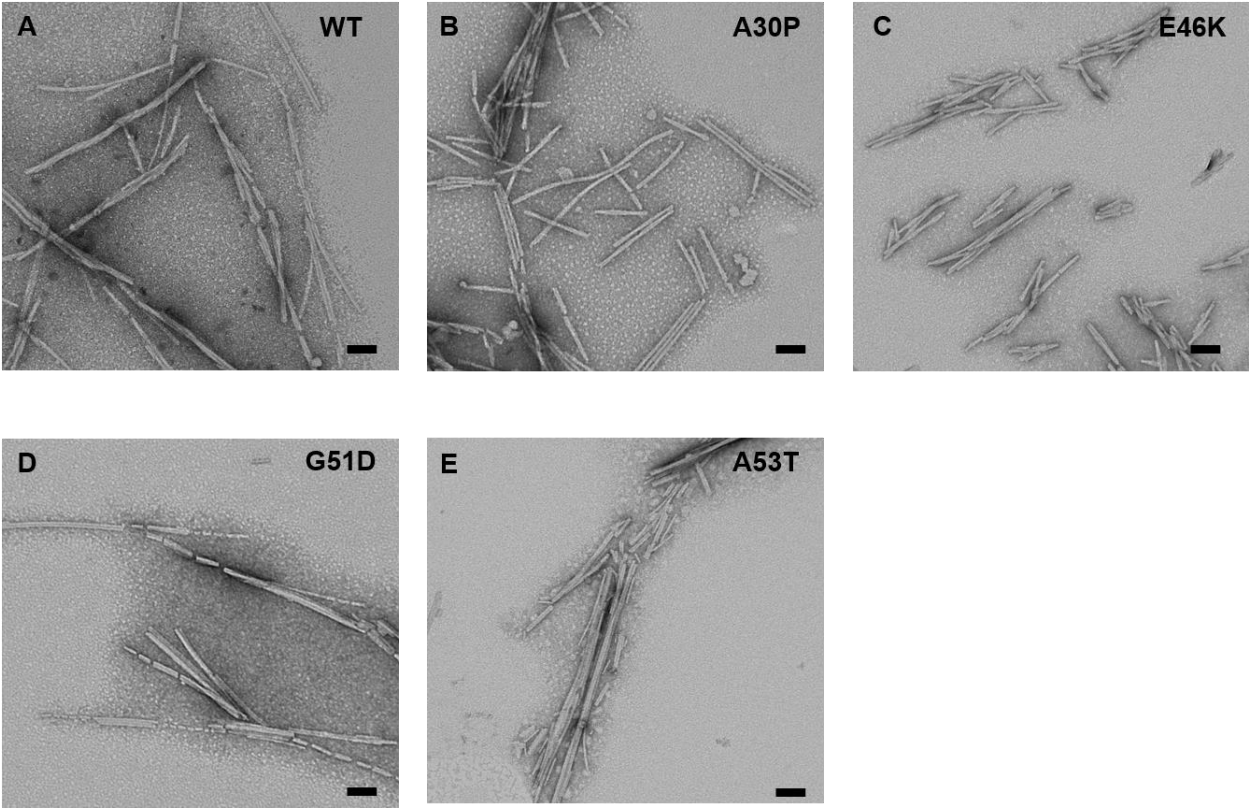

**Figure S2.** Representative negatively-stained transmission electron microscopy images of WT (A), A30P (B), E46K (C), G51D (D), and A53T (E)  $\alpha$ -syn fibrils formed at 40  $\mu$ M, 10 mM NaOAC, 100 mM NaCl, pH 5, 37  $^{\circ}$ C. Scale bars: 100 nm.

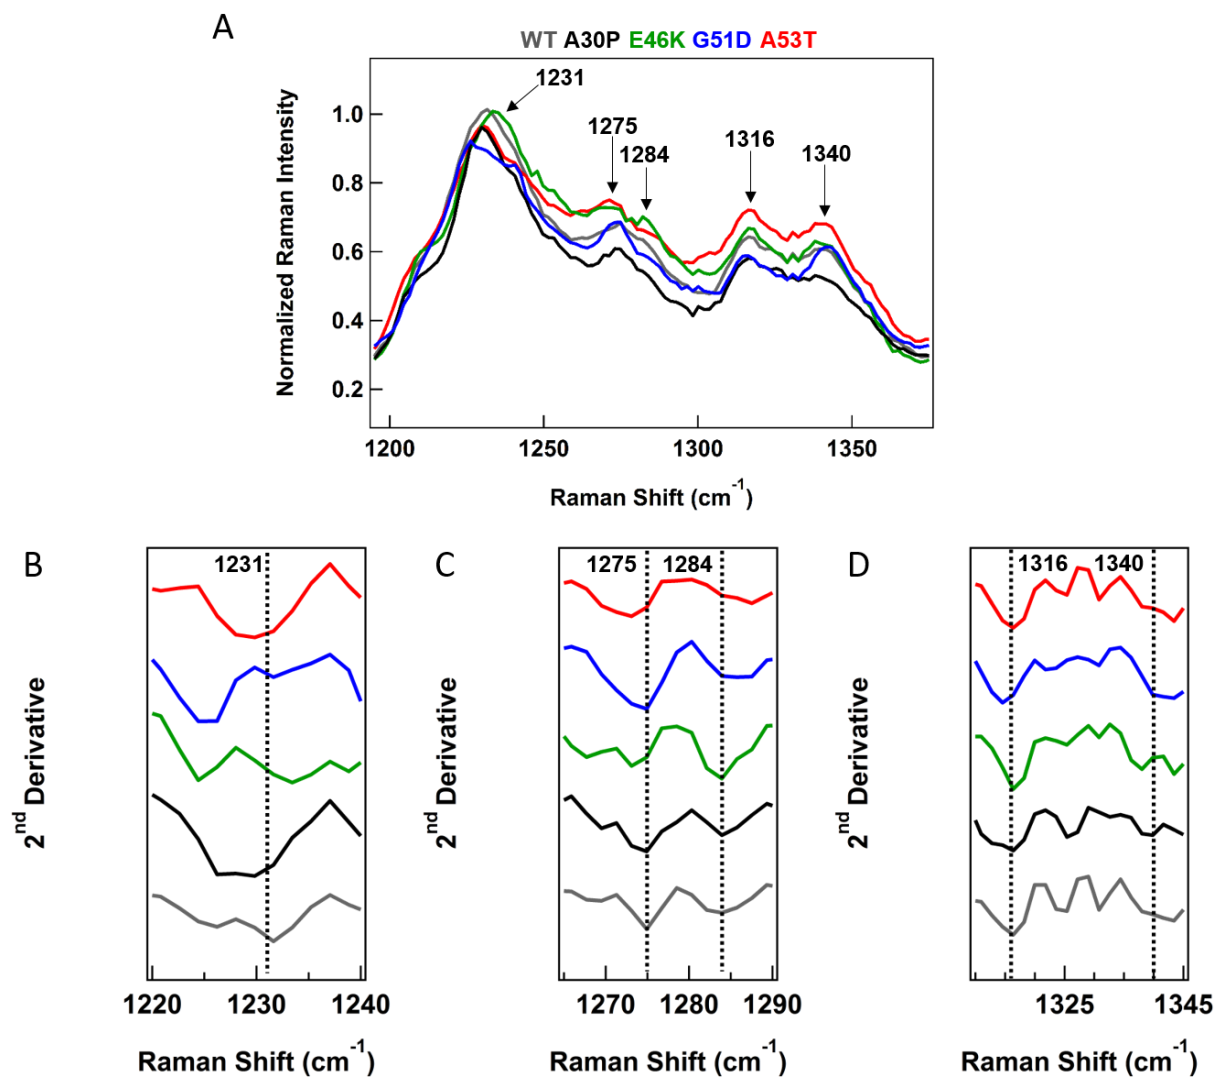

**Figure S3.** (A) Expanded view of fingerprint region for WT and mutant  $\alpha$ -syn. Second derivative analysis for amide-III region (B, C) and C-H deformation stretches (D).
